# Supplementary material
Source: PubMed Central journal article supplement (PMC9596317)
Supplement: mmc1.pdf [file mmc1.pdf]

Author(s) and Year

Encephalitis N

Proportion [95% CI]

Huhn et al. 2005

1 34

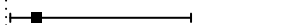

0.03 [0.00, 0.18]

Ogoina et al. 2020

3 40

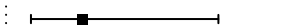

0.07 [0.02, 0.21]

( $I^2 = 0.0\%$ )

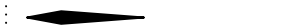

0.05 [0.02, 0.14]

0 0.05 0.15 0.25

Proportion
