# Supplementary material
Source: PubMed Central journal article supplement (PMC9596317)

Author(s) and Year

Headache

N

Proportion [95% CI]

Kalthan et al. 2016

2

12

0.17 [0.04, 0.48]

Pittman et al. 2022

49

216

0.23 [0.18, 0.29]

Croft et al. 2007

13

19

0.68 [0.45, 0.85]

( $I^2 = 81.4\%$ )

0.34 [0.14, 0.62]

0

0.2

0.4

0.6

0.8

1

Proportion

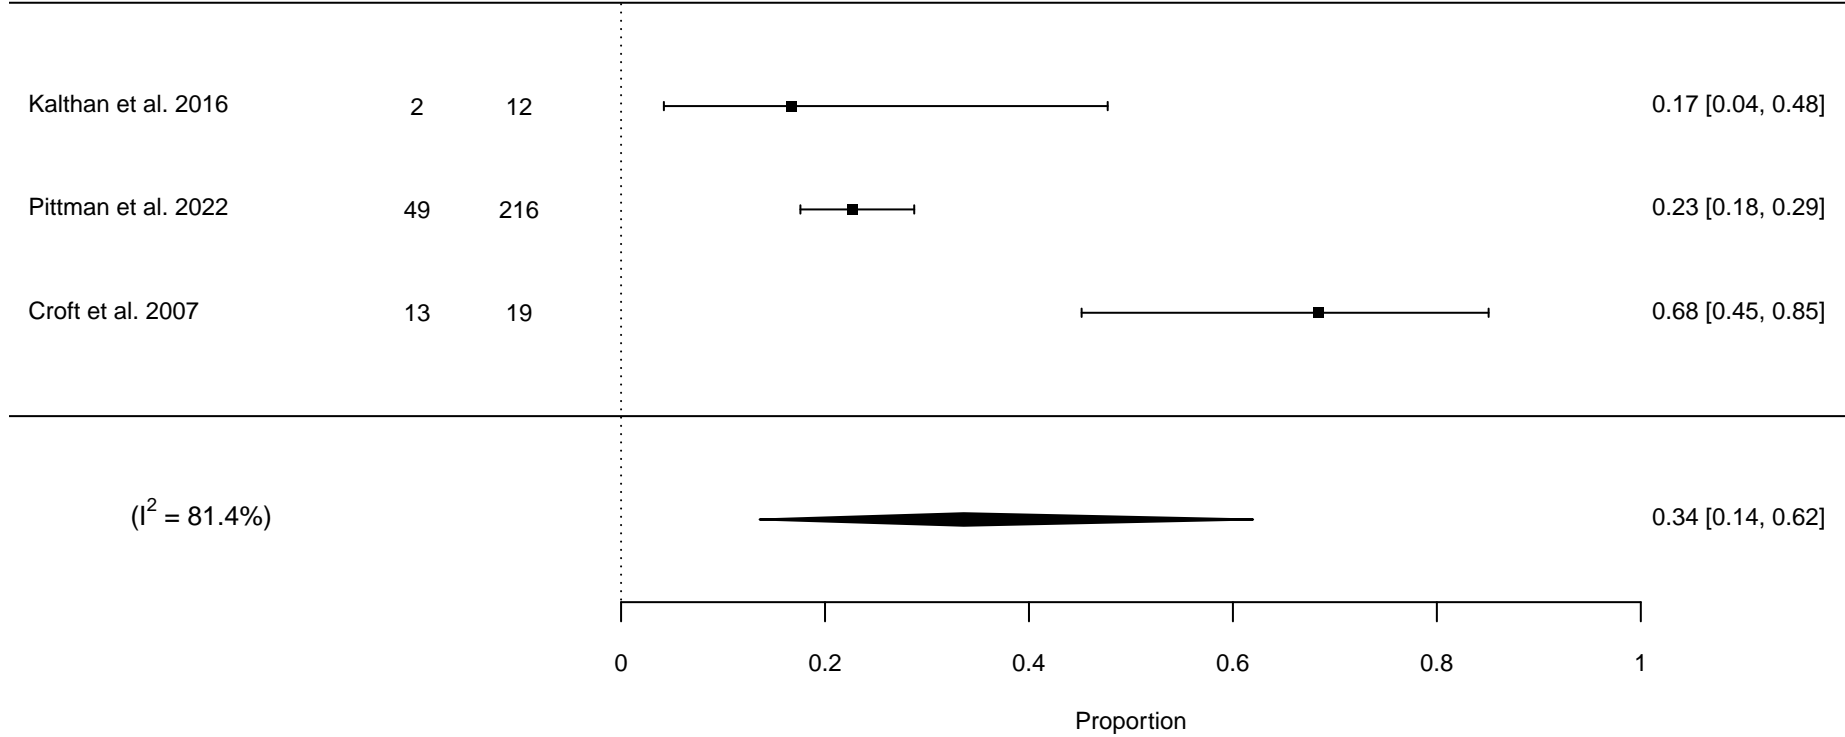

Supplement: mmc2.pdf [file mmc2.pdf]
