# Supplementary material
Source: PubMed Central journal article supplement (PMC9596317)
Supplement: mmc3.pdf [file mmc3.pdf]

Author(s) and Year

Myalgia

N

Proportion [95% CI]

Pittman et al. 2022

15

216

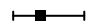

0.07 [0.04, 0.11]

Yinka-Ogunleye et al. 2019

42

118

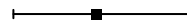

0.36 [0.27, 0.45]

( $I^2 = 94.7\%$ )

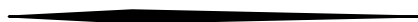

0.17 [0.05, 0.45]

0 0.1 0.2 0.3 0.4 0.5

Proportion
