# Supplementary material
Source: PubMed Central journal article supplement (PMC9596317)
Supplement: mmc4.pdf [file mmc4.pdf]

Author(s) and Year

Seizures

N

Proportion [95% CI]

Ogoina et al. 2020

1

40

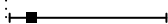

0.03 [0.00, 0.16]

Huhn et al. 2005

1

34

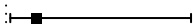

0.03 [0.00, 0.18]

( $I^2 = 0.0\%$ )

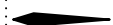

0.03 [0.01, 0.10]

0 0.05 0.15

Proportion
